# Supplementary material for: OM-85 Broncho-Vaxom®, a Bacterial Lysate, Reduces SARS-CoV-2 Binding Proteins on Human Bronchial Epithelial Cells
Source: MDPI journal article supplement (doi:10.3390/biomedicines9111544), 2021-10-26
Supplement: s1 [file s1]

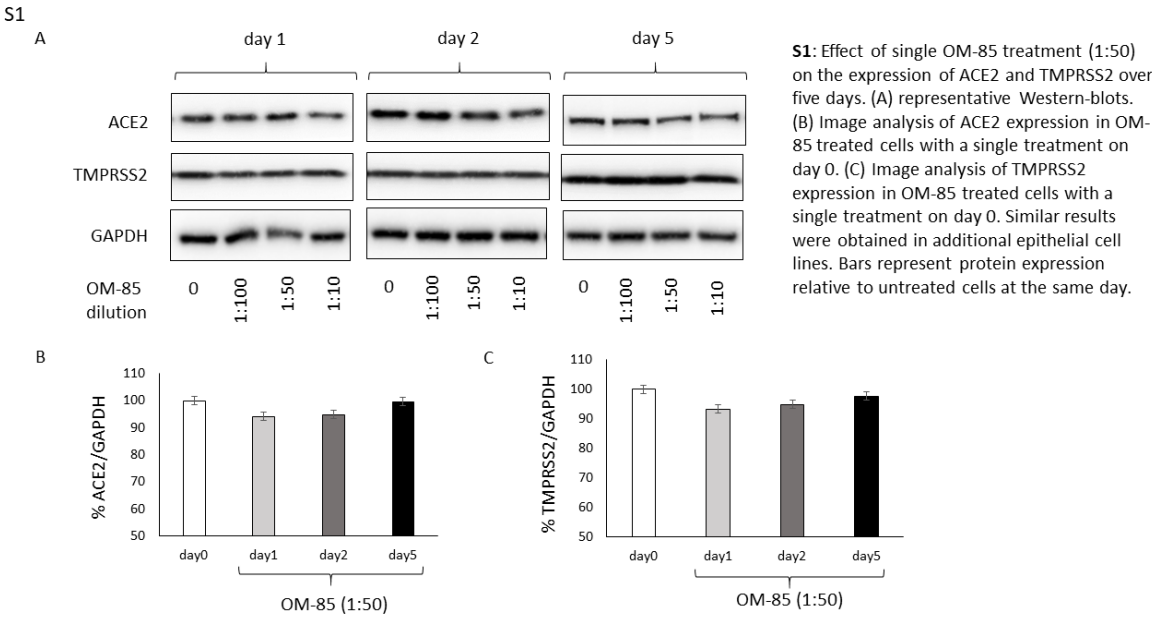

Figure S1. Effect of single OM-85 treatment on the expression of ACE2 and TMPRSS2 over 5 days.

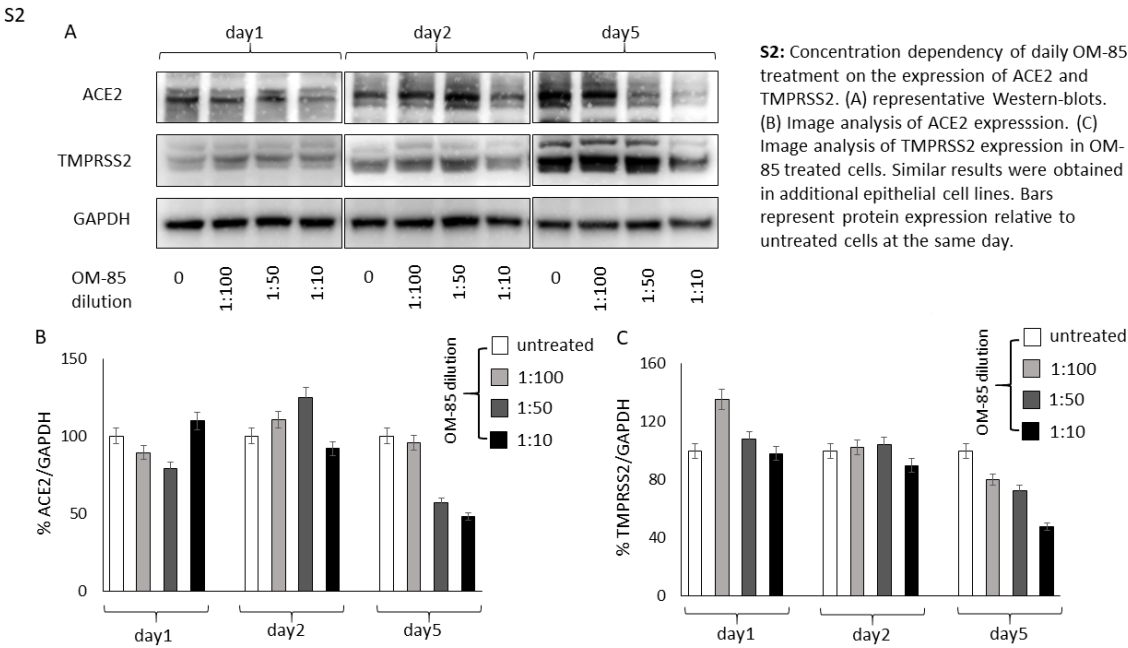

Figure S2. Concentration dependency of daily OM-85 treatment on the expression of ACE2 and TMPRSS2.
